# Supplementary material
Source: publisher site journal article supplement (https://www.dovepress.com/get_supplementary_file.php?f=Appendix%201.pdf)
Supplement: Supplementary file 1 [file get_supplementary_file.php]

Progesterone Study:

## Baseline Questionnaire: 24-28 Weeks

|                 |
|-----------------|
| ID Sticker HERE |
|-----------------|

TODAY'S DATE (D/M/Y): \_\_\_\_\_ / \_\_\_\_\_ / \_\_\_\_\_

PATIENT'S STUDY NUMBER: 14 - \_\_\_\_\_ - \_\_\_\_\_

| PATIENT CONTACT INFORMATION                                                                               |                                                                                  |               |                      |
|-----------------------------------------------------------------------------------------------------------|----------------------------------------------------------------------------------|---------------|----------------------|
| <input type="checkbox"/> Miss<br><input type="checkbox"/> Mrs.<br><input type="checkbox"/> Ms.            | <b>LAST NAME:</b> _____<br>First & Middle: _____<br>National (ART) ID No.: _____ |               |                      |
| Street address/Plot Number:                                                                               |                                                                                  | Home phone #: | Cellular Phone #(s): |
| P.O. Box:                                                                                                 | City: LUSAKA                                                                     | Prov: LUSAKA  | Country: ZAMBIA      |
| <input type="checkbox"/> USE PAGE 4 TO DOCUMENT DETAILED DIRECTIONS & MAP LOCATION OF PATIENT'S RESIDENCE |                                                                                  |               |                      |

| ALTERNATE CONTACT PERSONS                         |                          |               |                    |
|---------------------------------------------------|--------------------------|---------------|--------------------|
| Name of 1 <sup>st</sup> local friend or relative: | Relationship to patient: | Home phone #: | Work/cell phone #: |
| Address:                                          |                          |               |                    |
| Name of 2 <sup>nd</sup> local friend or relative: | Relationship to patient: | Home phone #: | Work/cell phone #: |
| Address:                                          |                          |               |                    |

| ADDITIONAL INFORMATION                                                                                                                                                                                                                          |                                                                                                                                                                                                                                                               |                                                                                                                                                                                                                                                      |
|-------------------------------------------------------------------------------------------------------------------------------------------------------------------------------------------------------------------------------------------------|---------------------------------------------------------------------------------------------------------------------------------------------------------------------------------------------------------------------------------------------------------------|------------------------------------------------------------------------------------------------------------------------------------------------------------------------------------------------------------------------------------------------------|
| <b>Q1.</b> Birth date (D/M/Y):<br>_____ / _____ / _____                                                                                                                                                                                         | <b>Q4.</b> Availability of Electricity (circle one):<br><input type="checkbox"/> 1 = none<br><input type="checkbox"/> 2 = poor/unreliable<br><input type="checkbox"/> 3 = fair<br><input type="checkbox"/> 4 = good<br><input type="checkbox"/> 5 = excellent | <b>Q6.</b> Owns a working refrigerator (circle one)?<br><input type="checkbox"/> 1 = Yes <input type="checkbox"/> 2 = No                                                                                                                             |
| <b>Q2.</b> Age: _____ years                                                                                                                                                                                                                     | <b>Q5.</b> Current Avg Monthly Household Income:<br>ZMK _____                                                                                                                                                                                                 | <b>Q7.</b> Highest level of education completed (circle one):<br><input type="checkbox"/> 1 = less than primary<br><input type="checkbox"/> 2 = primary<br><input type="checkbox"/> 3 = secondary<br><input type="checkbox"/> 4 = college/university |
| <b>Q3.</b> Marital status (circle one):<br><input type="checkbox"/> 1 = Single<br><input type="checkbox"/> 2 = Married<br><input type="checkbox"/> 3 = Divorced<br><input type="checkbox"/> 4 = Widow<br><input type="checkbox"/> 5 = Separated |                                                                                                                                                                                                                                                               |                                                                                                                                                                                                                                                      |

## OBSTETRICAL HISTORY

**Q8.** What number pregnancy is this (including miscarriages & abortions)? \_\_\_\_\_

**Q9.** How many previous children were born Full-Term (37 wks/9 months or more)? \_\_\_\_\_

**Q10.** How many previous children were born Pre-Term (less than 37 wks/9 months)? \_\_\_\_\_

**Q11.** How many miscarriages have you had? \_\_\_\_\_

**Q12.** How many of your live born children have died? \_\_\_\_\_

**Q13.** How many living children do you have? \_\_\_\_\_

**Q14.** Please note **# of living children** in each of the following categories of HIV status:  
**14a.** # Positive \_\_\_\_\_ **14b.** # Negative \_\_\_\_\_ **14c.** # Unknown Status \_\_\_\_\_

**Q15.** From her card, when she was HIV screened during this pregnancy (D/M/Y): \_\_\_\_ / \_\_\_\_ / \_\_\_\_

**Q16.** **16a.** Estimated Date of Delivery (D/M/Y): \_\_\_\_ / \_\_\_\_ / \_\_\_\_ **16b.** LMP: \_\_\_\_ / \_\_\_\_ / \_\_\_\_

**Q17.** **17a.** Current Estimated Gestational Age: \_\_\_\_\_ weeks **17b.** Current HOF: \_\_\_\_\_ weeks

**17c.** Number of babies patient is expecting this pregnancy:  
 1 = 1       2 = 2       3 = 3 or more (specify) \_\_\_\_       4 = Unsure

## MEDICAL HISTORY (I): *History of Sexually Transmitted Infections* (CIRCLE ANSWERS)

| Symptom/Infection                                                 | a. Currently                                                             | b. Within last 3 months                                                  | c. More than 3 months ago                                                |
|-------------------------------------------------------------------|--------------------------------------------------------------------------|--------------------------------------------------------------------------|--------------------------------------------------------------------------|
| <b>Q18.</b> Purulent, foul-smelling or copious vaginal discharge? | a. 1 = Yes 2 = No 9 = Unsure<br>>> If Yes, Tx:<br>1 = Y 2 = N 9 = Unsure | b. 1 = Yes 2 = No 9 = Unsure<br>>> If Yes, Tx:<br>1 = Y 2 = N 9 = Unsure | c. 1 = Yes 2 = No 9 = Unsure<br>>> If Yes, Tx:<br>1 = Y 2 = N 9 = Unsure |
| <b>Q19.</b> Genital Ulcers?                                       | a. 1 = Yes 2 = No 9 = Unsure<br>>> If Yes, Tx:<br>1 = Y 2 = N 9 = Unsure | b. 1 = Yes 2 = No 9 = Unsure<br>>> If Yes, Tx:<br>1 = Y 2 = N 9 = Unsure | c. 1 = Yes 2 = No 9 = Unsure<br>>> If Yes, Tx:<br>1 = Y 2 = N 9 = Unsure |
| <b>Q20.</b> Genital Vesicles?                                     | a. 1 = Yes 2 = No 9 = Unsure<br>>> If Yes, Tx:<br>1 = Y 2 = N 9 = Unsure | b. 1 = Yes 2 = No 9 = Unsure<br>>> If Yes, Tx:<br>1 = Y 2 = N 9 = Unsure | c. 1 = Yes 2 = No 9 = Unsure<br>>> If Yes, Tx:<br>1 = Y 2 = N 9 = Unsure |
| <b>Q21.</b> Syphilis (use RPR test result if available)           | a. 1 = Yes 2 = No 9 = Unsure<br>>> If Yes, Tx:<br>1 = Y 2 = N 9 = Unsure | b. 1 = Yes 2 = No 9 = Unsure<br>>> If Yes, Tx:<br>1 = Y 2 = N 9 = Unsure | c. 1 = Yes 2 = No 9 = Unsure<br>>> If Yes, Tx:<br>1 = Y 2 = N 9 = Unsure |



Please write detailed directions to participant's residence:

Draw map showing location of patient's residence below:

\* ONLY COMPLETE THIS PAGE FOR WOMEN ENROLLED IN THE HIV+ CONTROL GROUP! \*

| <b>SUPPLEMENTAL BASELINE QUESTIONNAIRE:<br/>FOR HIV POSITIVE MOTHERS</b>                                                                                                                                                                   |                                                                             |
|--------------------------------------------------------------------------------------------------------------------------------------------------------------------------------------------------------------------------------------------|-----------------------------------------------------------------------------|
| Patient's Study ID #: <b>14</b> – ____ – ____                                                                                                                                                                                              | Today's date (D/M/Y): ____ / ____ / ____                                    |
| <b>Q34.</b> Date of <b>FIRST</b> positive HIV test (D/M/Y): ____ / ____ / ____                                                                                                                                                             |                                                                             |
| <b>Q35.</b> Are you currently taking antiretroviral medications? <input type="checkbox"/> 1=Yes <input type="checkbox"/> 2=No<br>>>If Yes, <b>35b.</b> Date started or restarted (if ARV treatment was disrupted) ARVs: ____ / ____ / ____ |                                                                             |
| <b>Q36.</b> Most Recent CD4 Count: _____ per mm <sup>3</sup> Date of Most Recent CD4 Count: ____ / ____ / ____                                                                                                                             |                                                                             |
| <b>Q37. If already on ARVs:</b> Please check off the ones the patient is taking now:                                                                                                                                                       |                                                                             |
| <i>Do not Contain Protease Inhibitors (eligible):</i>                                                                                                                                                                                      | <i>Ones that Contain Protease Inhibitors (exclude from study):</i>          |
| 37a. <input type="checkbox"/> <b>TDF + FTC + EFV (Viraday/"Atripla")</b>                                                                                                                                                                   | 37n. <input type="checkbox"/> Aluvia (Lopinavir/ritonavir)                  |
| 37b. <input type="checkbox"/> Combivir (AZT + 3TC)                                                                                                                                                                                         | 37o. <input type="checkbox"/> Norvir (Ritonavir)                            |
| 37c. <input type="checkbox"/> Truvada (TDF + FTC)                                                                                                                                                                                          | 37p. <input type="checkbox"/> Reyataz (Atazanavir)                          |
| 37d. <input type="checkbox"/> Trimune (D4T + 3TC + NVP)                                                                                                                                                                                    | 37q. <input type="checkbox"/> Norvir (Ritonavir)                            |
| 37e. <input type="checkbox"/> Stavudine/Lamivudine (D4T + 3TC)                                                                                                                                                                             | 37r. <input type="checkbox"/> Prezista (Darunavir)                          |
| 37f. <input type="checkbox"/> Viramune (Nevirapine, i.e. NVP)                                                                                                                                                                              |                                                                             |
| 37g. <input type="checkbox"/> Viread (Tenofovir, i.e. TDF)                                                                                                                                                                                 |                                                                             |
| 37h. <input type="checkbox"/> Lamivudine (3TC)                                                                                                                                                                                             |                                                                             |
| 37i. <input type="checkbox"/> Emtricitabine (FTC)                                                                                                                                                                                          |                                                                             |
| 37j. <input type="checkbox"/> Zidovudine (AZT)                                                                                                                                                                                             | <u>OR:</u>                                                                  |
| 37k. <input type="checkbox"/> Abacavir (ABC)                                                                                                                                                                                               |                                                                             |
| 37l. <input type="checkbox"/> Stavudine (D4T)                                                                                                                                                                                              | 37s. <input type="checkbox"/> Other (specify type and # of pills/day) _____ |
| 37m. <input type="checkbox"/> Sustiva (Efavirenz; EFV)                                                                                                                                                                                     | 37t. <input type="checkbox"/> Taking medication, but unsure of which one(s) |
| <b>Q38. If NOT already on ARVs:</b> Please check off the one(s) the patient intends to start taking with the ARV clinic:                                                                                                                   |                                                                             |
| <i>Do not Contain Protease Inhibitors (eligible):</i>                                                                                                                                                                                      | <i>Ones that Contain Protease Inhibitors (exclude from study):</i>          |
| 38a. <input type="checkbox"/> <b>TDF + FTC + EFV (Viraday/"Atripla")</b>                                                                                                                                                                   | 38n. <input type="checkbox"/> Aluvia (Lopinavir/ritonavir)                  |
| 38b. <input type="checkbox"/> Combivir (AZT + 3TC)                                                                                                                                                                                         | 38o. <input type="checkbox"/> Norvir (Ritonavir)                            |
| 38c. <input type="checkbox"/> Truvada (TDF + FTC)                                                                                                                                                                                          | 38p. <input type="checkbox"/> Reyataz (Atazanavir)                          |
| 38d. <input type="checkbox"/> Trimune (D4T + 3TC + NVP)                                                                                                                                                                                    | 38q. <input type="checkbox"/> Norvir (Ritonavir)                            |
| 38e. <input type="checkbox"/> Stavudine/Lamivudine (D4T + 3TC)                                                                                                                                                                             | 38r. <input type="checkbox"/> Prezista (Darunavir)                          |
| 38f. <input type="checkbox"/> Viramune (Nevirapine, i.e. NVP)                                                                                                                                                                              |                                                                             |
| 38g. <input type="checkbox"/> Viread (Tenofovir, i.e. TDF)                                                                                                                                                                                 |                                                                             |
| 38h. <input type="checkbox"/> Lamivudine (3TC)                                                                                                                                                                                             |                                                                             |
| 38i. <input type="checkbox"/> Emtricitabine (FTC)                                                                                                                                                                                          | <u>OR:</u>                                                                  |
| 38j. <input type="checkbox"/> Zidovudine (AZT)                                                                                                                                                                                             |                                                                             |
| 38k. <input type="checkbox"/> Abacavir (ABC)                                                                                                                                                                                               | 38s. <input type="checkbox"/> Other (specify type and # of pills/day) _____ |
| 37l. <input type="checkbox"/> Stavudine (D4T)                                                                                                                                                                                              | 38t. <input type="checkbox"/> Plans to take but doesn't know which one(s)   |
| 37m. <input type="checkbox"/> Sustiva (Efavirenz; EFV)                                                                                                                                                                                     | 38u. <input type="checkbox"/> Does not plan to take ARVs                    |
